# Supplementary material
Source: publisher site journal article supplement (https://www.dovepress.com/article/421300)
Supplement: Supplementary file 1 [file get_supplementary_file.php]

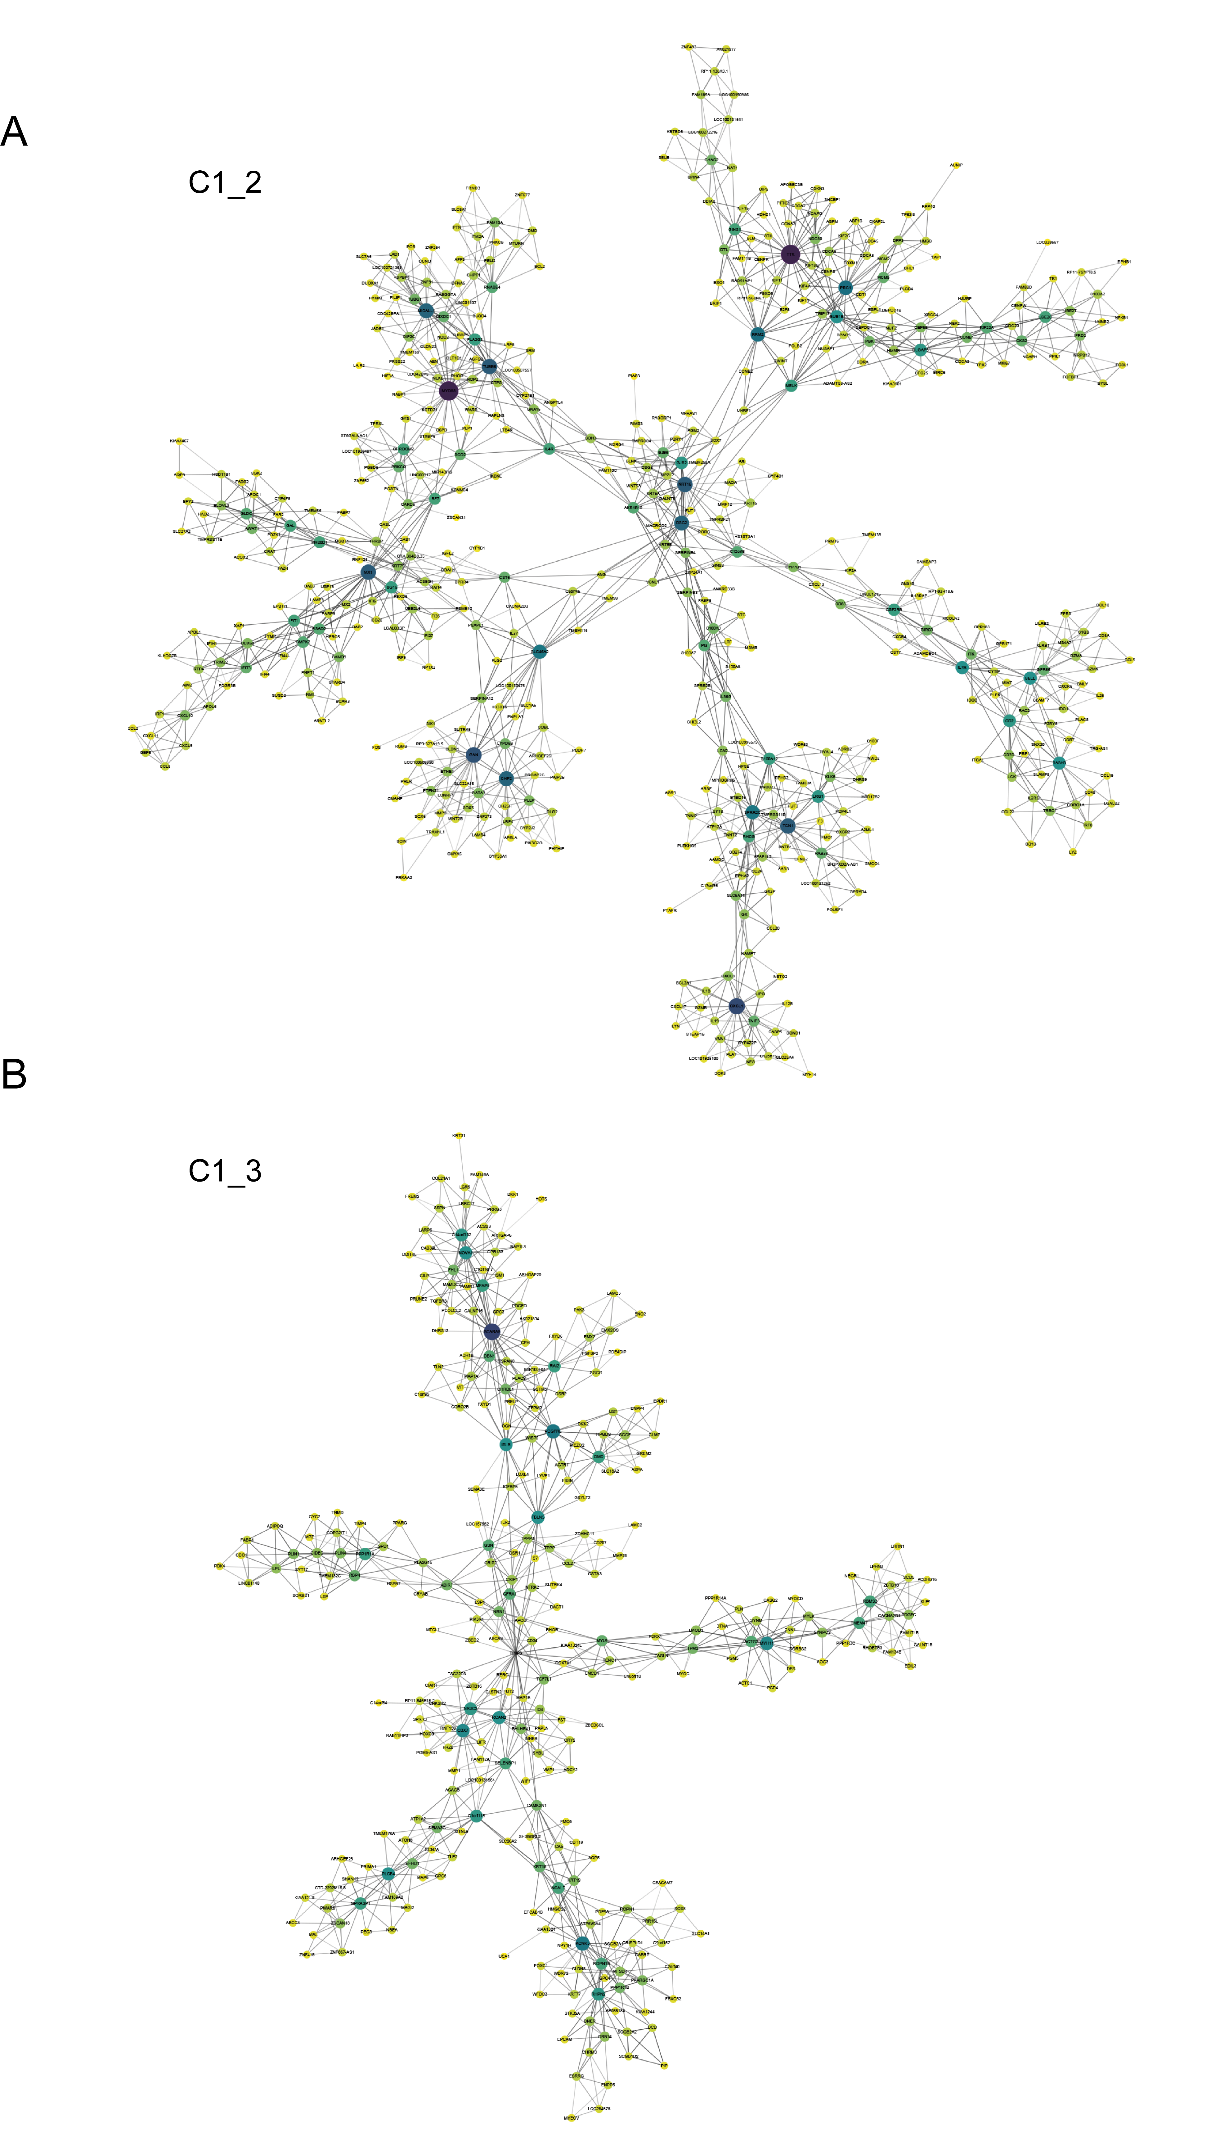


Figure S1. The MEGENA network showing the two largest gene modules (A, C1_2; B, C1_3) generated by Cytoscape. Darker colors and larger sizes represent larger degree values for nodes.


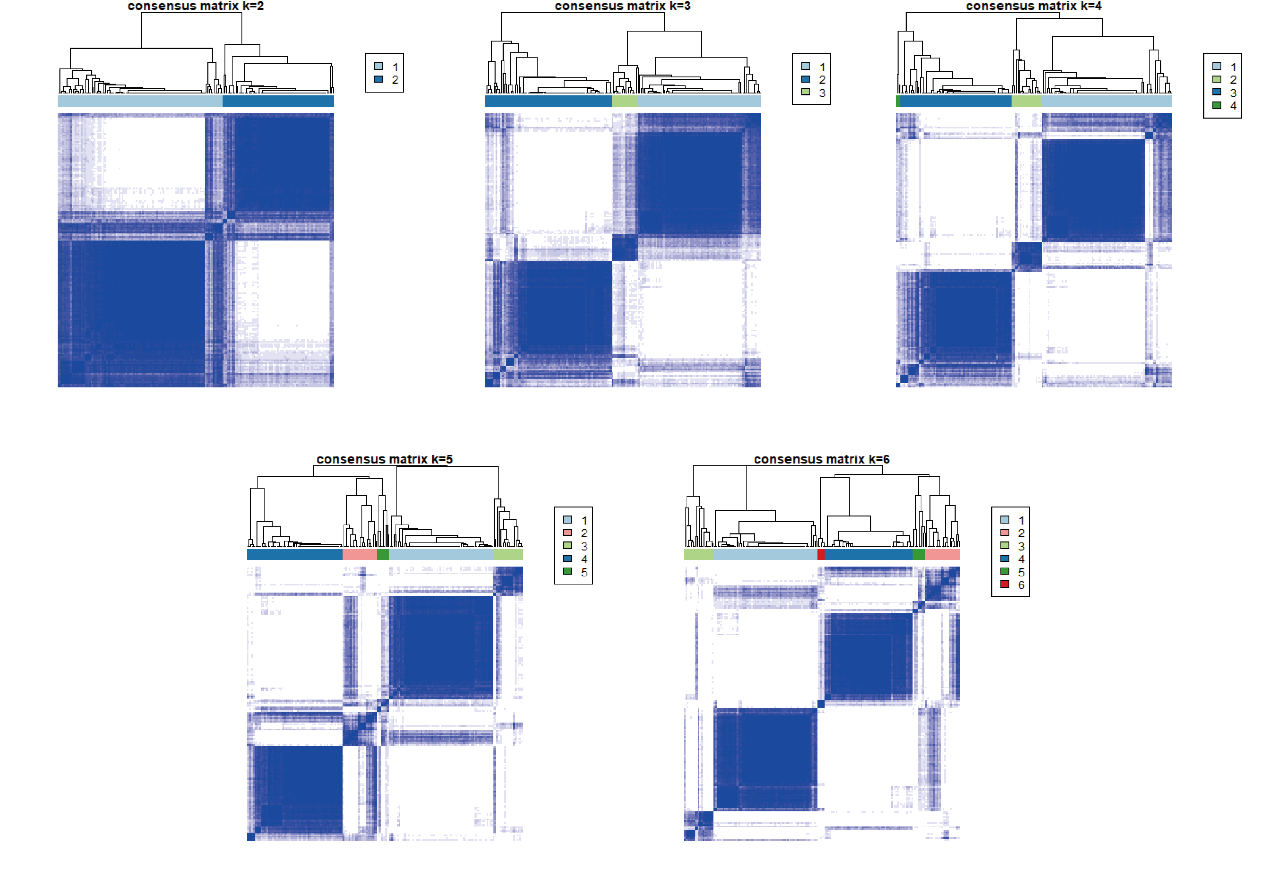


Figure S2. The consensus score matrix of all samples when k = 2-6 (Merged cohort).


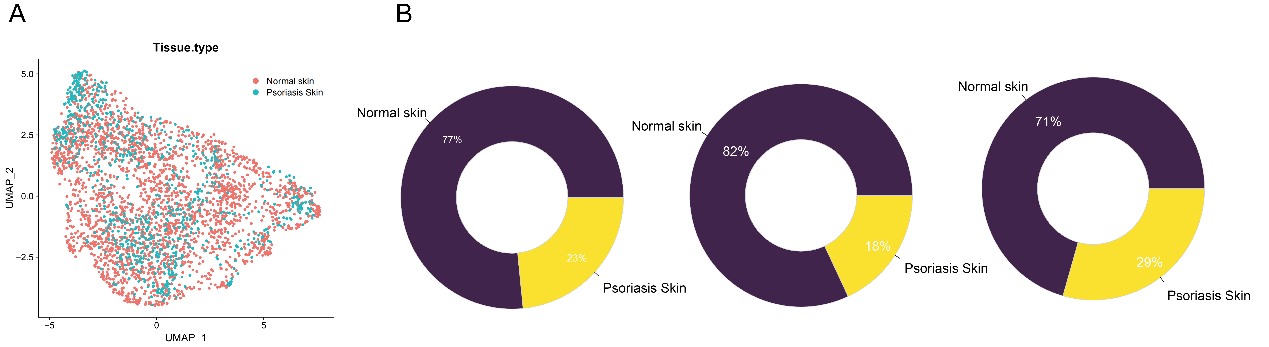


Figure S3. UMAP (A) and pie (B) plots showing the tissue origin of keratinocytes, respectively.


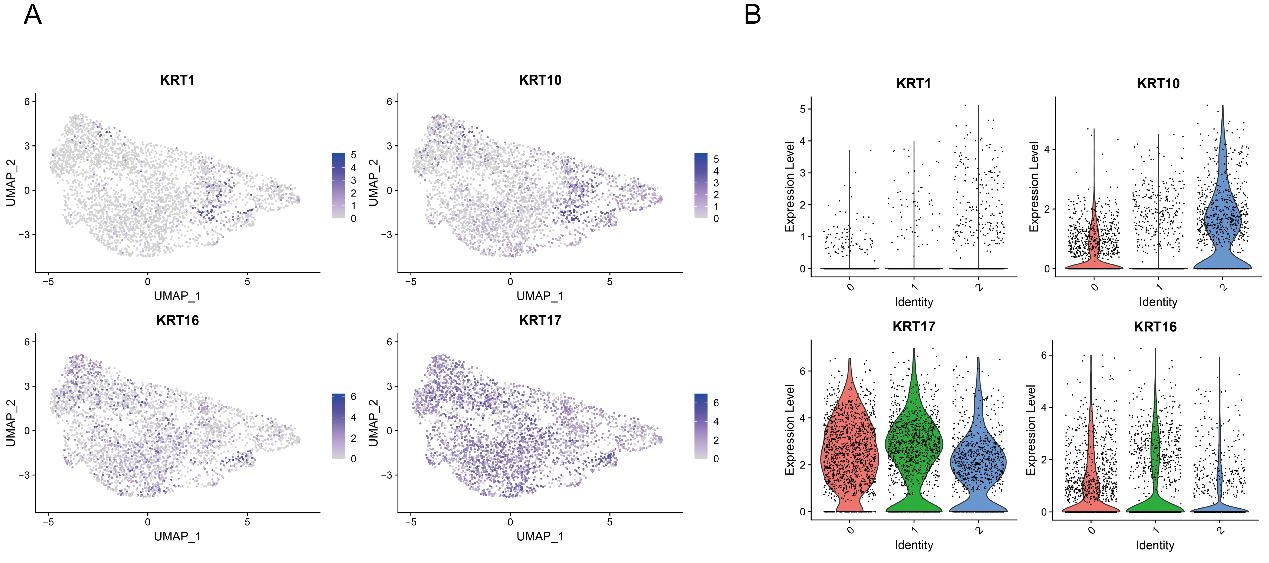


Figrue S4. UMAP (A) and violin (B) plots showing the expression level of *KRT1/10/16/17* in all keratinocytes at the single cell level.


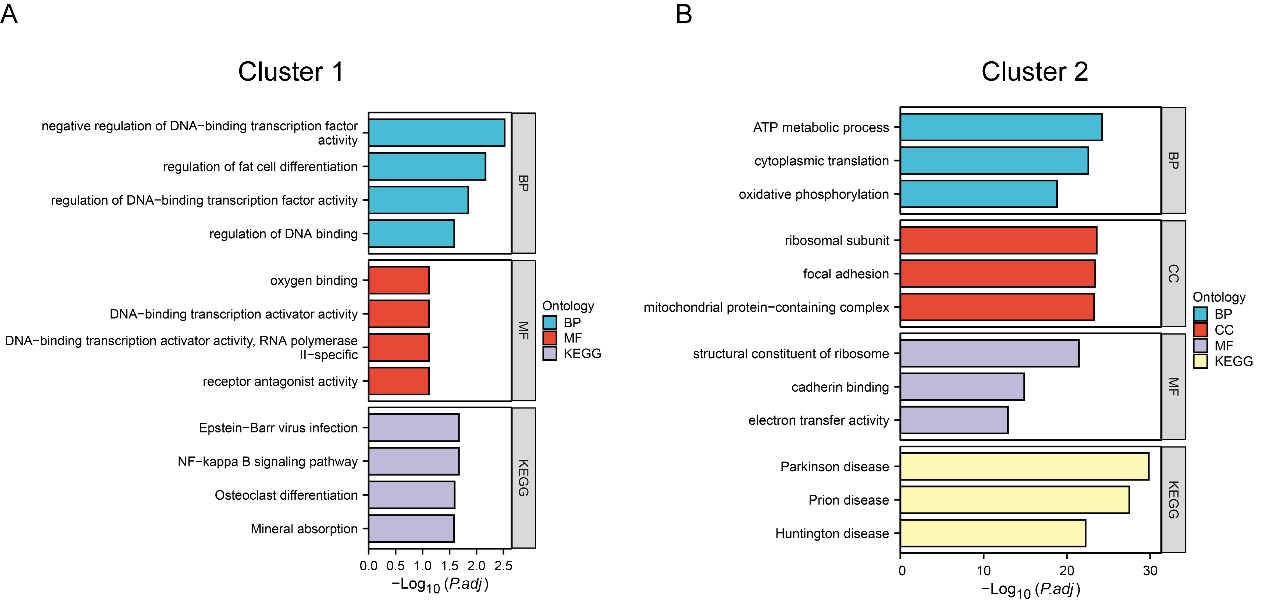


Figure S5. Enrichment analysis for Cluster 1 (A) and Cluster 2 (B).


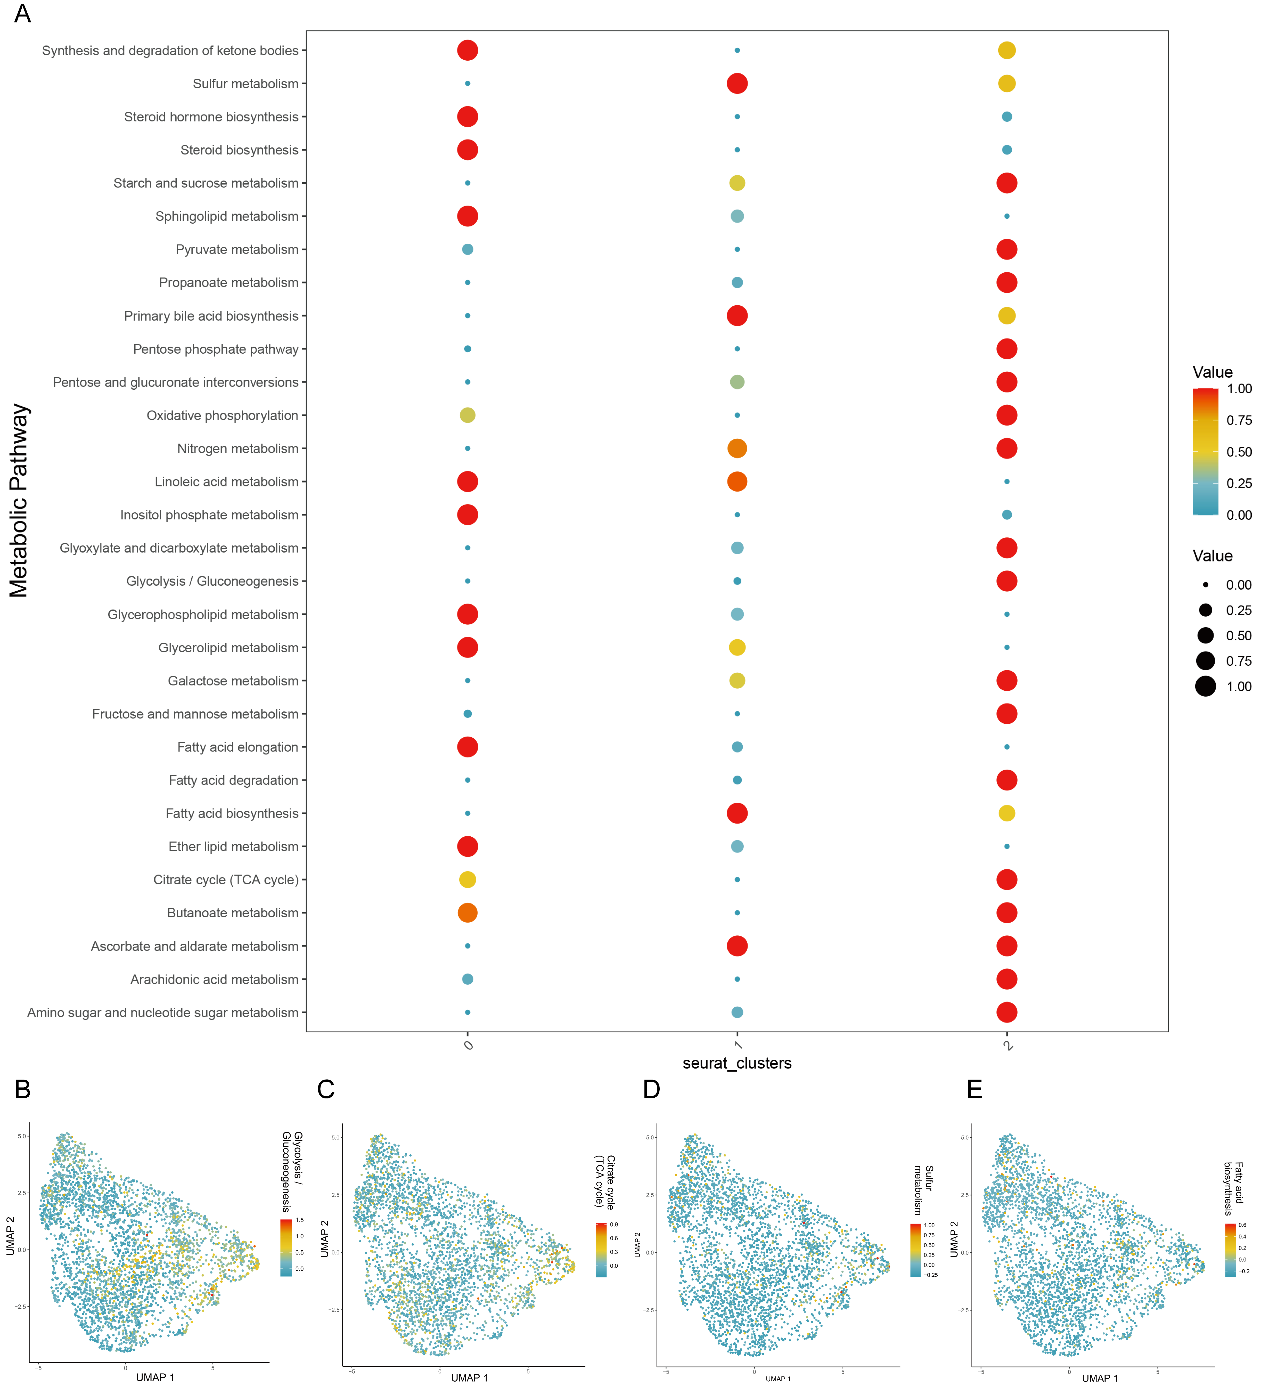


Figure S6. scMetabolism estimates the metabolic level of each keratinocyte based on the KEGG database. Bubble plots showing the activity of all metabolic pathways and UMAP plots showing the activity of glycolysis, TCA cycle, sulfur metabolism and fatty acid biosynthesis in different keratinocyte clusters.


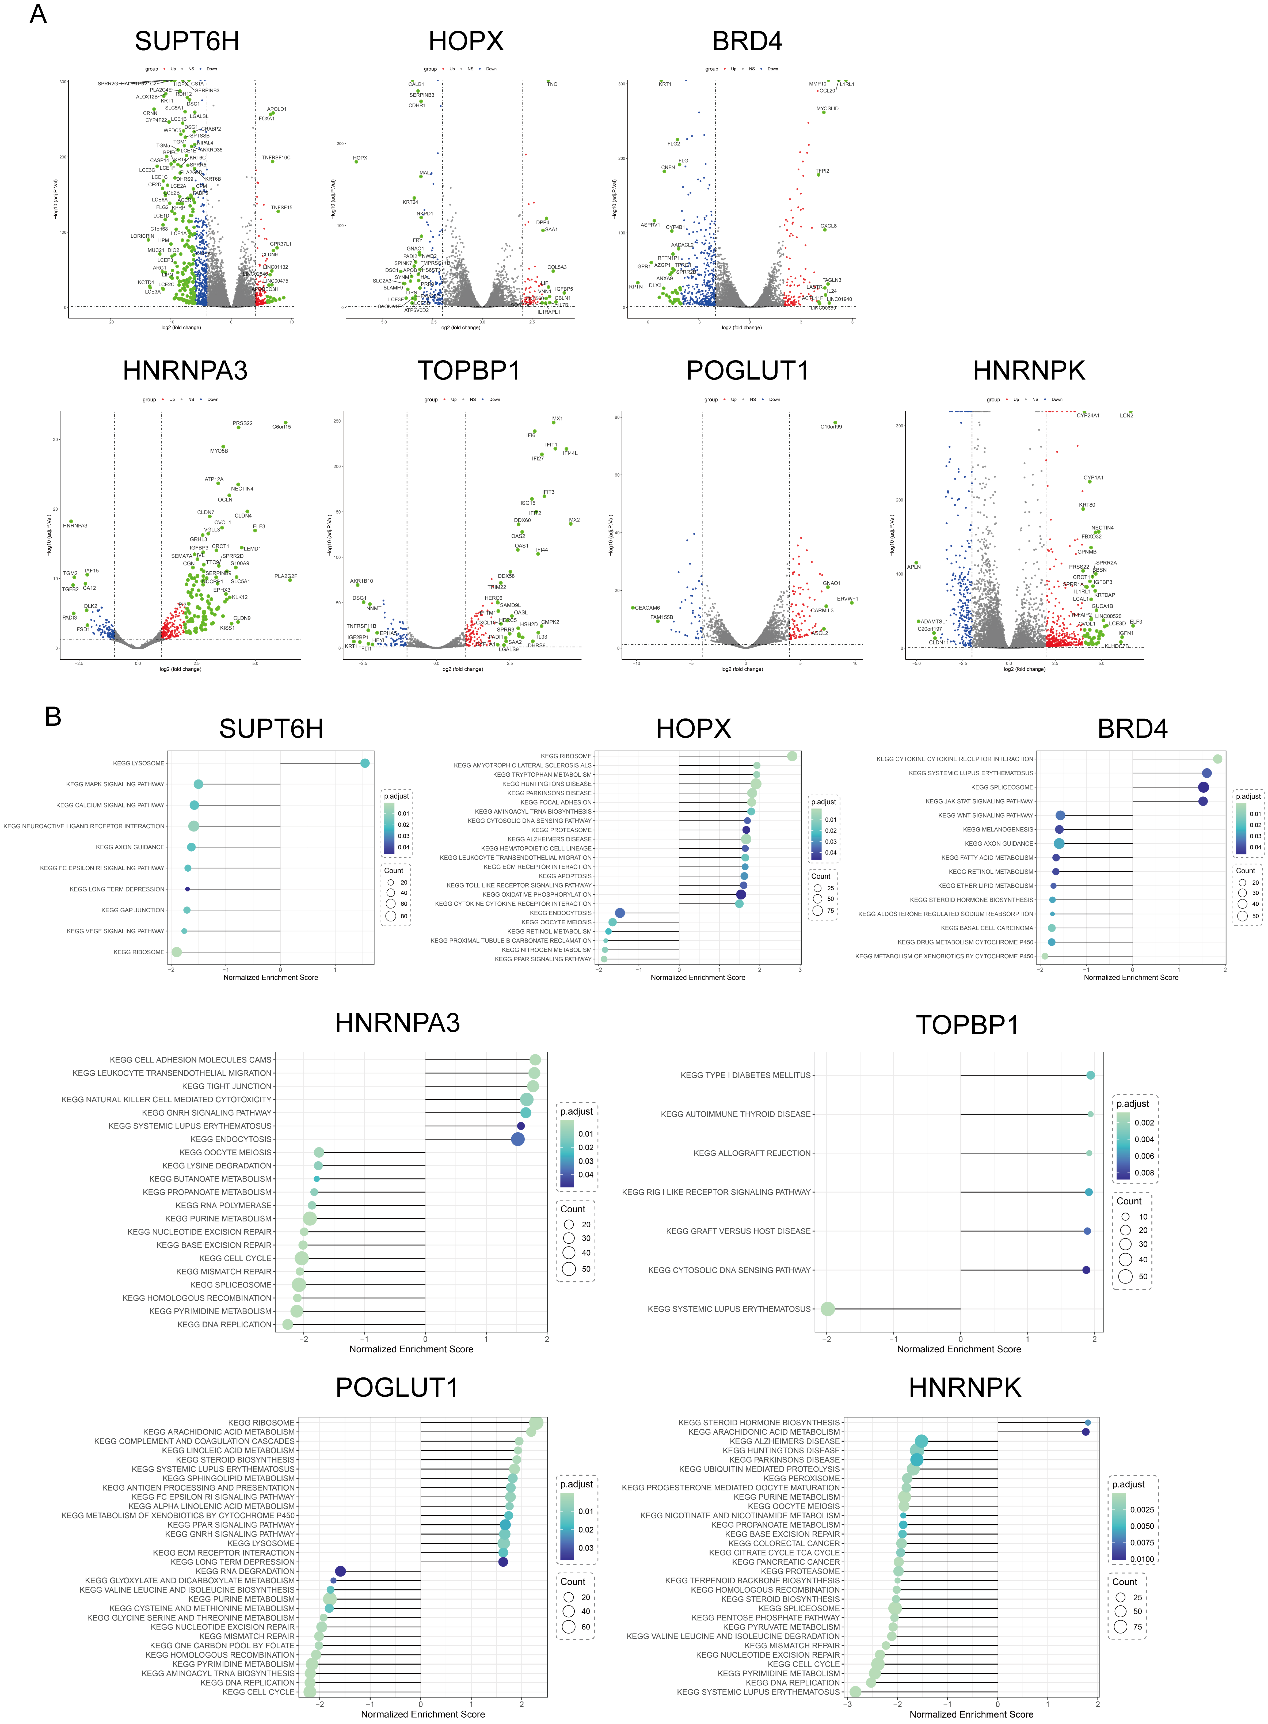


Figure S7. Volcano plots showing the differential genes after perturbing the target genes in each dataset and bubble diagram showing the corresponding function enrichment.


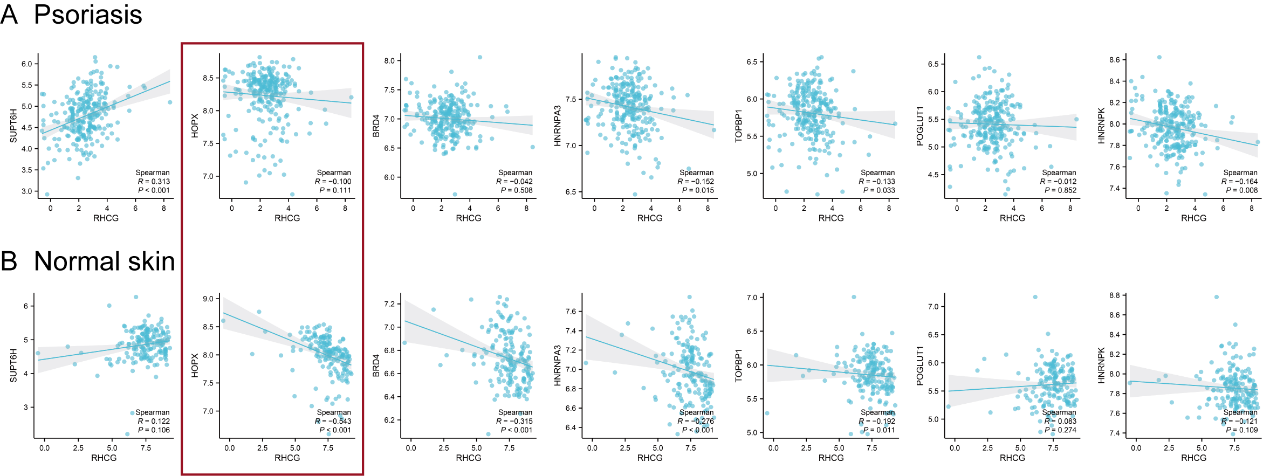


Figure S8. Scatter plot demonstrating the correlation between RHCG and pbgenes in normal (A) and psoriasis (B) samples.


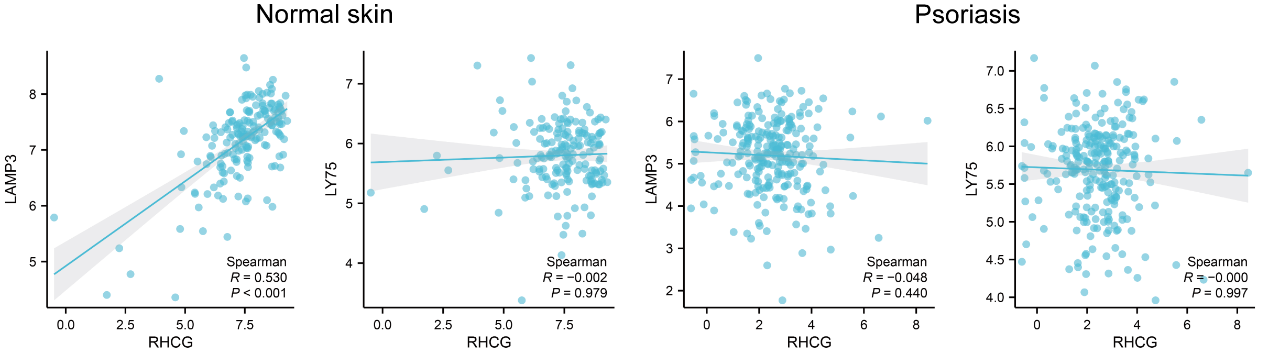


Figure S9. Scatter plot demonstrating the correlation between RHCG and DC cell maturation markers (LAMP3 and LY75).


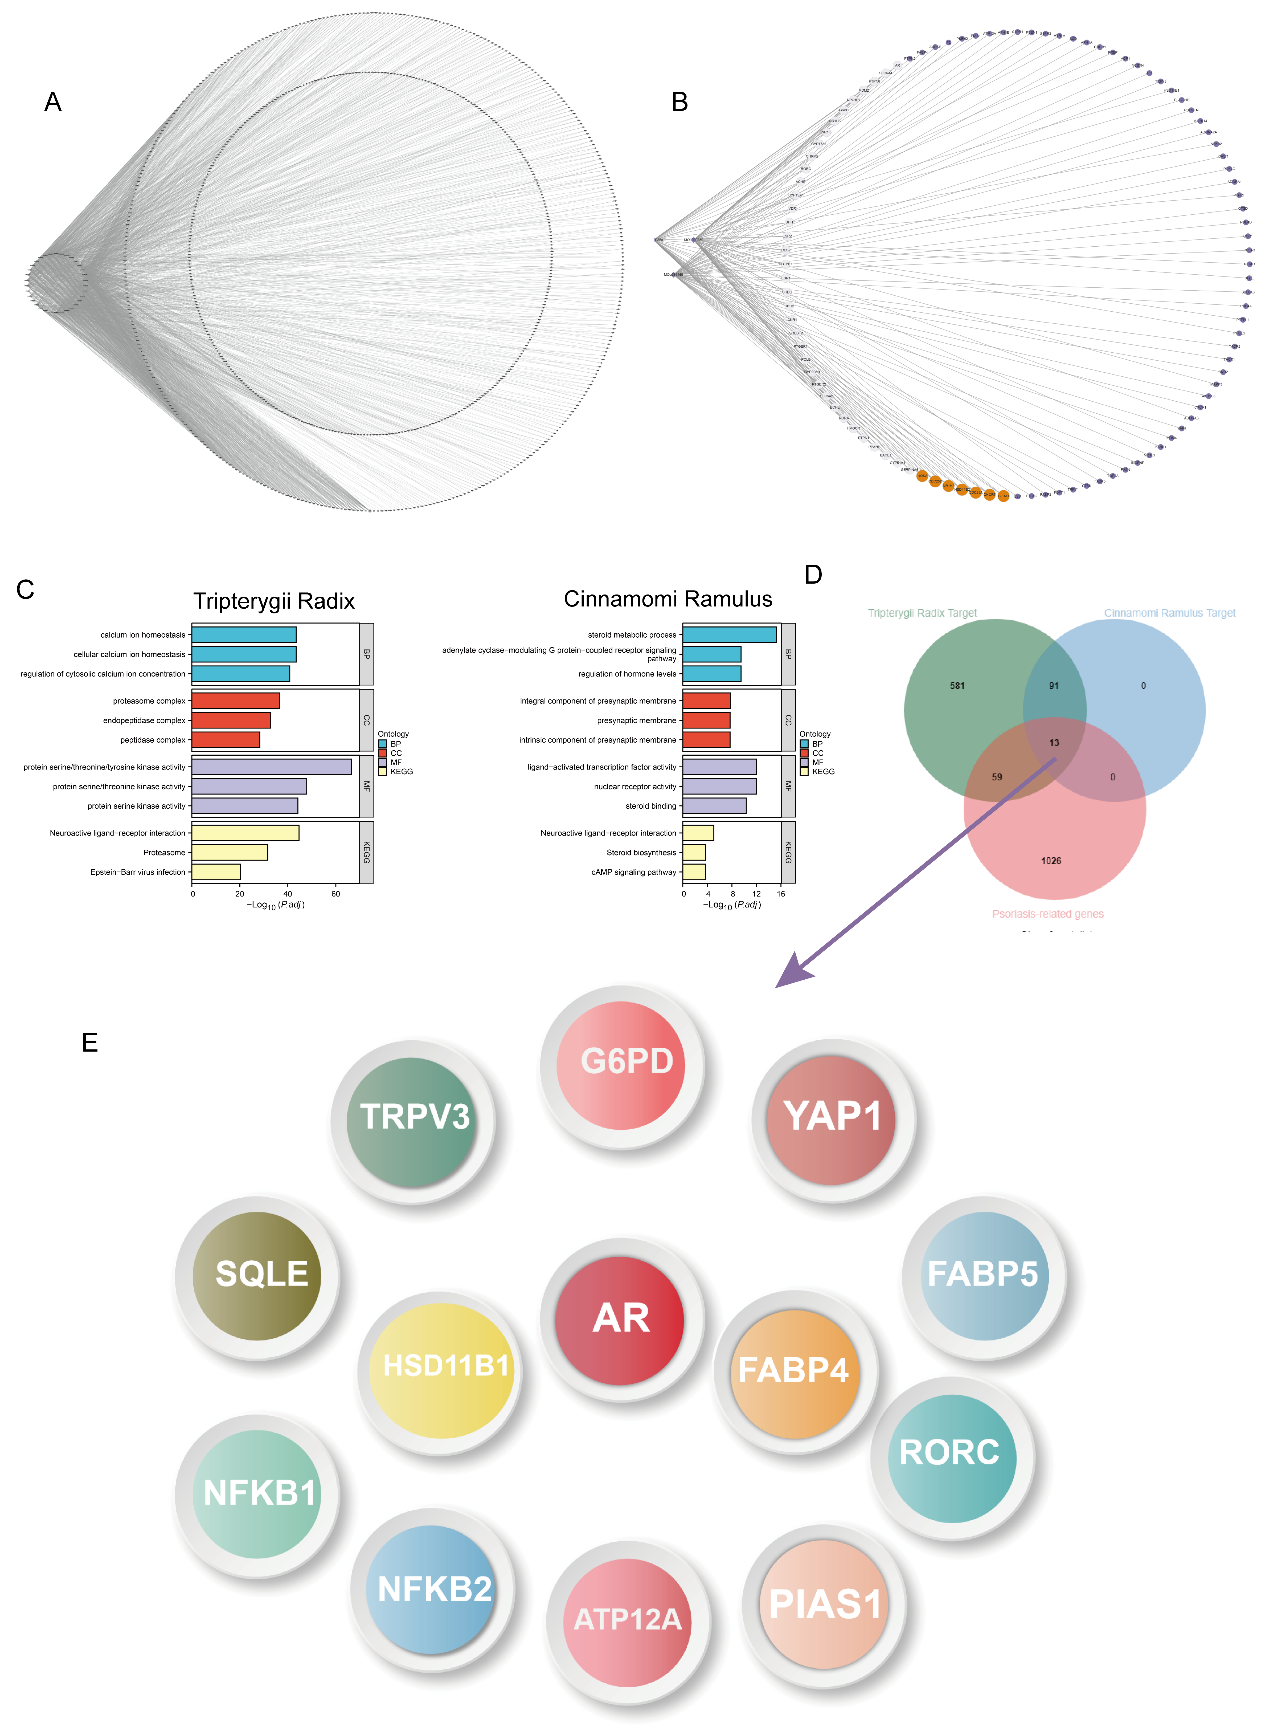


Figure S10. Network pharmacological analysis of CR and TR. (A-B) Drug- key compounds- hub targets-pathways network for CR (A) and TR (B). The node size for each hub gene represents the relative hubness, and connection color indicates both the direction and degree of correlation with other hub genes. (C) Bar Plot displaying the most enriched GO (including Biological processes, Cellular components, and Molecular function) and KEGG terms. (D-E) Gene list intersection among TR targets, CR targets, and DEGs in merged GEO dataset.


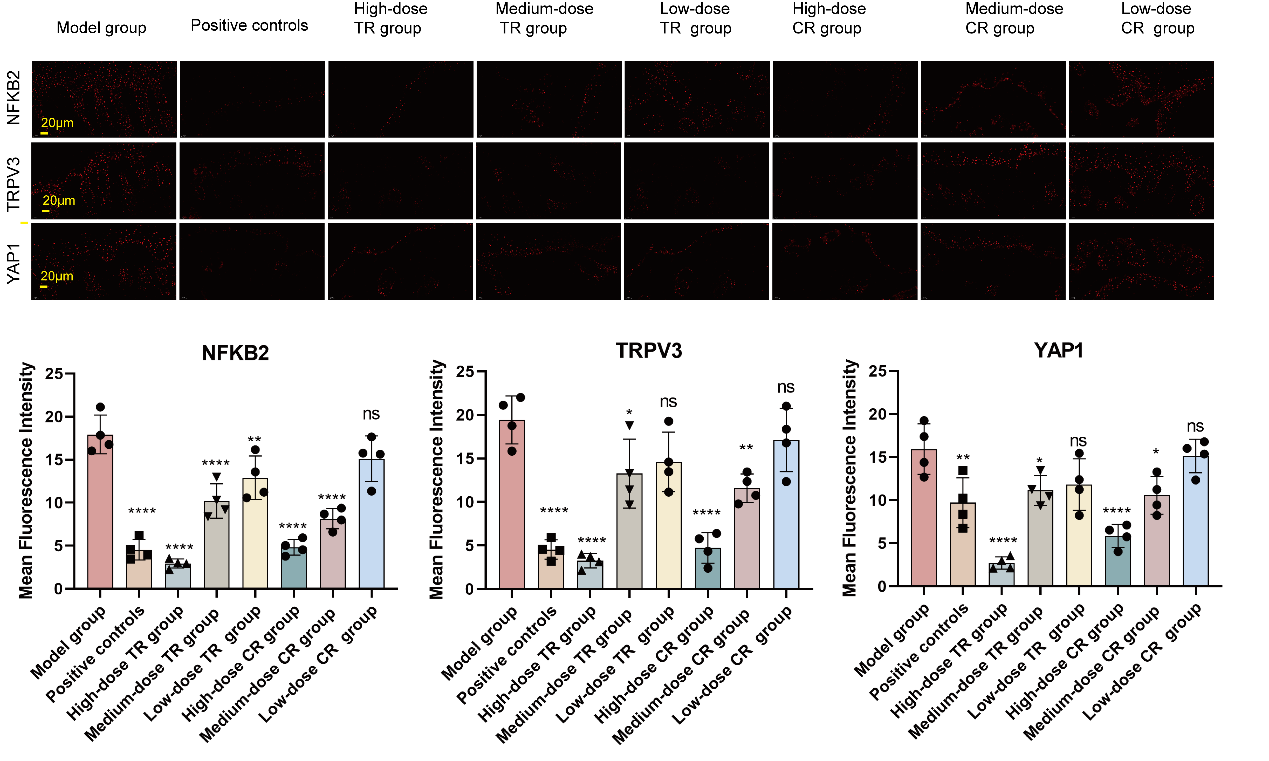


Figure S11. Immunofluorescence intensities showing NFKB2, TRPV3, and YAP1 expression across different intervention conditions (n = 4). One-way ANOVA was conducted. *P < 0.05, **P < 0.01, ****P < 0.0001. Model, imiquimod; Low dose, 0.585 g/kg/day; medium dose, 1.17 g/kg/day; high dose, 2.34 g/kg/day.

# Supplementary Table 1

| Antibodies and Reagents | Manufacturer, Country, Cat number | Concentration |
| --- | --- | --- |
| KRT1 monoclonal antibody | Abnova, US, #H00003848-M01 | IF 1:100 |
| KRT17 monoclonal antibody | Abnova, US, #MAB11306 | IF 1:100 |
| RHCG Polyclonal Antibody | Thermo Fisher Scientific, US, # PA5-59767 | IF 1:200  WB 1:1000 |
| Hopx Polyclonal Antibody | Thermo Fisher Scientific, US, # PA5-90538 | IF 1:100  WB 1:1000 |
| Anti-β-actin Mouse polyclonal Antibody | Proteintech, China, 20536-1-AP | WB 1:5000 |
| HE staining kit | Beyotime Biotechnology, China, #C0105, | - |
| LAMP3 Polyclonal Antibody | Thermo Fisher Scientific, US, #PA5-84069 | IF 1:200 |
| NF-κB2 p100/p52 (18D10) Rabbit mAb | Cell Signaling Technology, US, # 3017 | IHC: 1:300 |
| Anti-TRPV3 Antibody | Abcam, UK, # ab231150 | IHC: 10 µg/ml |
| YAP1 Polyclonal Antibody | Thermo Fisher Scientific, US, # PA1-46189 | IHC: 1:200 |
| Alexa Fluor 488 AffiniPure goat anti-mouse IgG (H+L) | FcMACS, China, #136908 | IF1:500 |
| Goat anti-mouse IgG (H+L) CoraLite594 | Proteintech, China, #SA00013-4 | IF 1:500 |
| Fluorescein (FITC) conjugated Affinipure Goat Anti-Rabbit IgG(H+L) | Proteintech, China, # SA00003-2 | IF 1:500 |
| Dulbecco’s modified Eagle’s medium (DMEM) | Gibco, USA, #8121032 | - |
| Plasmid vectors for HOPX | GeneChem, China, #GIEE233618 |  |
| Imiquimod (IMQ) cream | 3M Health Care, UK, #H20150172 |  |
| Mometasone Furoate Cream | Bayer Pharmaceuticals, Germany # H20040853 |  |
|  |  |  |
|  |  |  |
|  |  |  |
|  |  |  |
|  |  |  |
